# Supplementary material for: Trends, Regional Inequalities, and Future Projections of Anemia among Women of Reproductive Age (15-49 years) in Ghana (2000–2030)
Source: Research Square preprint supplement (doi:10.21203/rs.3.rs-7215917/v1), 2025-08-07
Supplement: Supplementary file 1 [file 14a92da080280965f958b44d.docx]

**Supplementary files**

**File1:** Residual diagnostics for suitability-selected ARIMA model (1, 1, 0)


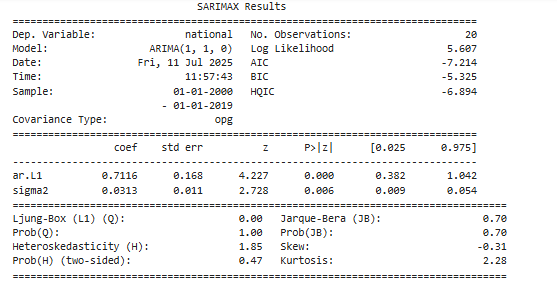


Residual diagnostics for suitability-selected ARIMA model (1, 1, 0)

File 2:Percentage decline in Anemia prevalence from 2000 to 2019

File 3: National and Regional Anemia prevalence (all types) in women of reproductive age (15-49 years) (%) in Ghana:2000-2019

| **Year** | **National** | **Ashanti** | **Brong Ahafo** | **Central** | **Eastern** | **Greater Accra** | **Northern** | **Upper East** | **Upper West** | **Volta** | **Western** |
| --- | --- | --- | --- | --- | --- | --- | --- | --- | --- | --- | --- |
| 2019 | 44.3 | 37.3(28.7, 46.3) | 36.1(28.5, 44.6) | 42.2(33.9, 50.8) | 44.8(36.4, 52) | 47.6(37.9, 56.4) | 52.5(45.8, 59.3) | 49.6(41.9, 56.9) | 45.2(36.6, 53.5) | 58.3(53, 63.4) | 37.5(28.8, 45.8) |
| 2018 | 44.6 | 37.6(29, 46.6) | 36.3(28.7, 44.8) | 42.4(34.2, 51.1) | 45(36.6, 52.3) | 47.9(38.2, 56.7) | 52.7(46.1, 59.5) | 49.9(42.2, 57.2) | 45.5(36.8, 53.7) | 58.6(53.3, 63.7) | 37.8(29, 46.1) |
| 2017 | 44.9 | 37.9(29.6, 46.9) | 36.7(29.2, 45.1) | 42.6(34.3, 51.3) | 45.2(36.7, 52.6) | 48.3(38.5, 57.4) | 52.9(46.4, 59.3) | 50.4(43.1, 57.7) | 45.5(36.9, 54.2) | 59.1(54.1, 64) | 38.1(29.4, 46.5) |
| 2016 | 45.2 | 39.3(32.1, 46.7) | 38.7(32.4, 45.5) | 44.6(38.7, 51.8) | 45.6(39.3, 51.3) | 47(39.4, 54.3) | 52.7(47.3, 58.2) | 48.2(42.5, 54.7) | 44.9(37.7, 52.3) | 57.1(52.9, 61.3) | 40.7(33.6, 48.1) |
| 2015 | 45.5 | 41(35.4, 46.4) | 39.6(34.6, 44.7) | 46(41.8, 50.8) | 44.9(40.2, 49.5) | 46.6(40.9, 52.5) | 52(47.8, 56.1) | 46.6(42, 51.6) | 44.6(39.1, 50.7) | 54.6(51, 58.2) | 43.1(37.6, 48.4) |
| 2014 | 45.4 | 41.5(36.5, 46) | 40.9(37, 44.7) | 48.5(44.9, 52.7) | 44(40.5, 47.8) | 44.9(40.5, 49.6) | 51.7(48.2, 55.3) | 44.2(40.4, 48.1) | 42.6(37.9, 47.3) | 53.1(49.7, 56.5) | 45.1(40.9, 49.4) |
| 2013 | 45.5 | 41.5(37, 46) | 43.9(39.8, 47.7) | 49.8(45.4, 54.1) | 44.1(40.2, 48.3) | 45.4(40.5, 50) | 49.1(45.6, 53) | 40.3(36.6, 44.1) | 40.1(36.1, 44.2) | 49.2(45.8, 52.4) | 49.4(45.2, 53.6) |
| 2012 | 45.5 | 45.4(39.7, 51.5) | 46.5(41.7, 51.2) | 49.2(43.7, 54.3) | 44.3(39.5, 49.8) | 43(37.5, 48.8) | 46.6(42.4, 51.8) | 37.2(33.7, 41.6) | 40.2(35.6, 44.4) | 44.7(40.9, 48.6) | 52(46.2, 57.4) |
| 2011 | 45.7 | 46.4(38.6, 54.1) | 48.9(42.5, 54.8) | 51.5(44, 58.7) | 43.7(37.3, 50.7) | 40.4(33.4, 47.5) | 46.9(41.4, 53.6) | 37.2(32.6, 42.6) | 41.8(35.8, 47.1) | 42.4(37.9, 47.1) | 55(47.7, 61.9) |
| 2010 | 46.3 | 48.2(38.2, 57.9) | 52(43.4, 59.9) | 55.1(46, 64) | 43.3(35.6, 52.4) | 39(30.4, 48.9) | 45.6(38.6, 53.8) | 35.9(30.1, 42.7) | 41.9(34.9, 48.9) | 39.2(34, 44.6) | 59.6(50.9, 68.2) |
| 2009 | 46.6 | 51(45.1, 57.2) | 49.5(43.9, 55.1) | 52.9(47, 58.7) | 44.1(39, 50) | 39.1(33.7, 45.2) | 45.9(41.2, 51.4) | 37.4(33.6, 42.3) | 45.1(40.2, 50.2) | 41.2(37.3, 44.9) | 56.8(50.7, 62.8) |
| 2008 | 46.7 | 50.5(46.6, 54.7) | 47(42.8, 50.8) | 50.8(47, 54.9) | 45.9(42.2, 49.4) | 39.7(35.7, 43.7) | 46.9(43.1, 50.7) | 39.9(36, 43.8) | 48.9(44.4, 53.2) | 42.7(39.5, 46) | 54.9(50.5, 59.4) |
| 2007 | 46.6 | 49.6(43.8, 54.9) | 45.7(40.5, 50.5) | 47.6(42.6, 53.2) | 47.7(42, 52.3) | 40.1(34.9, 45.2) | 48.7(43.3, 53.3) | 44.6(39, 50) | 51.1(45.7, 56.4) | 45.6(40.9, 50.3) | 50.5(45.2, 56.6) |
| 2006 | 46.7 | 48.1(39.8, 56.7) | 44.5(37.3, 52.1) | 46.1(38.1, 54.2) | 49.1(40.9, 56.8) | 40.8(32.3, 48.9) | 50.5(43.4, 56.9) | 46.8(39.1, 53.7) | 54.7(46, 62.6) | 49.2(42.8, 56.1) | 47.1(38.7, 55.8) |
| 2005 | 46.8 | 48.1(36.1, 60.3) | 42.7(32.8, 53.1) | 44.5(33.2, 55.8) | 51(39.8, 61.7) | 41.5(30, 53) | 50.2(40, 59) | 50(39.8, 59) | 57.5(46, 67.8) | 51.7(42.9, 59.9) | 43.8(32.7, 56.4) |
| 2004 | 47.1 | 46.4(39.3, 53.1) | 42(36.4, 48.3) | 45.1(38.7, 51.7) | 51.5(44.6, 58.2) | 44.8(37.6, 51.7) | 49.8(43.6, 55.7) | 51.2(45.2, 56.8) | 54.5(47.6, 60.9) | 52.8(47, 58.5) | 42.8(35.9, 50.4) |
| 2003 | 47.3 | 46.2(42.4, 49.8) | 41(37.6, 44.6) | 44.5(40.8, 48.4) | 50.9(47.3, 54.9) | 46.1(41.7, 50.8) | 50.5(46.3, 54.3) | 53.5(49.4, 58.1) | 52.1(47.8, 56.5) | 55.6(51.8, 59.7) | 41(37.3, 45.4) |
| 2002 | 47.4 | 44.5(37.5, 50.9) | 40.2(34.4, 46.8) | 45.8(39.6, 52.3) | 50.2(43.5, 56.5) | 47.3(40.6, 55) | 52.3(46.7, 57.9) | 54(47.6, 61) | 49(41.6, 55.5) | 56(50.3, 61.5) | 42(35.1, 48.4) |
| 2001 | 47.5 | 44.2(32.4, 56) | 40.4(30.5, 51.6) | 45.6(33.8, 57.6) | 49.7(39.6, 60.8) | 50(38.8, 62.4) | 51.6(42.4, 61.1) | 54.4(44.2, 65.2) | 44.4(32.9, 56.3) | 57.3(48.1, 65.8) | 40.8(29.7, 52.5) |
| 2000 | 47.8 | 43.3(27.6, 60.6) | 40.1(25.8, 56.3) | 46.8(31, 63.6) | 49.4(34.7, 65.3) | 52.9(36.4, 70.4) | 51.1(38.4, 64.1) | 55.1(41.3, 70.5) | 41(26.1, 56.8) | 58.1(45.8, 70.1) | 40.2(24.9, 56.5) |
